# Supplementary material for: Clinical and Genetic Analyses of 38 Chinese Patients with Peutz‐Jeghers Syndrome
Source: Hindawi journal article supplement (doi:10.1155/2020/9159315), 2020-01-01
Supplement: f1 [file 9159315.f1.zip]

**Family 1**

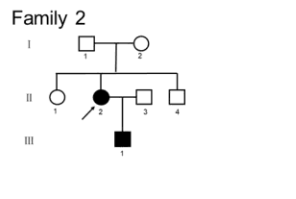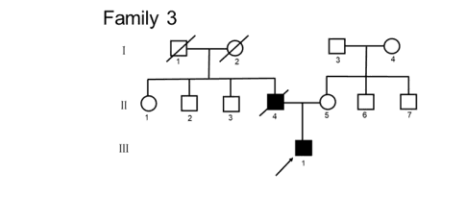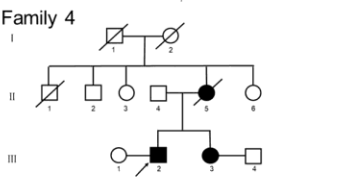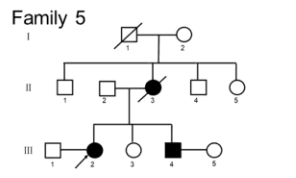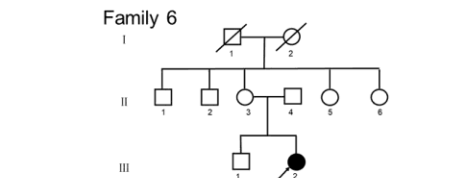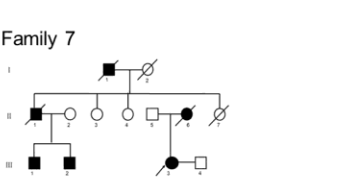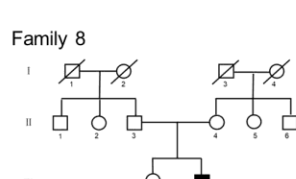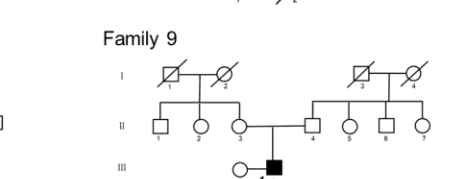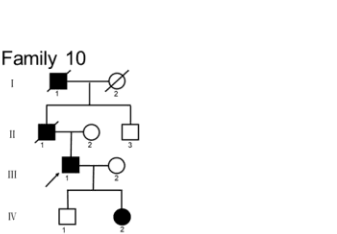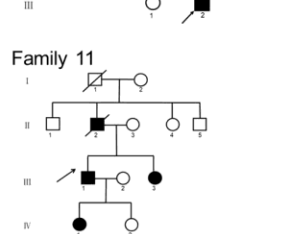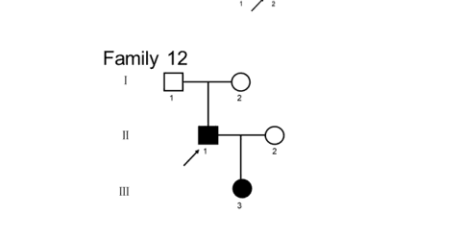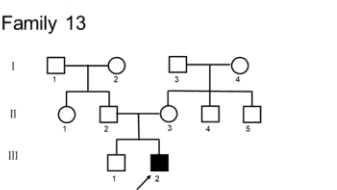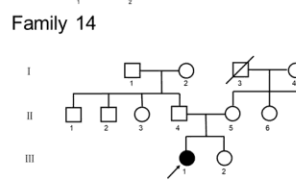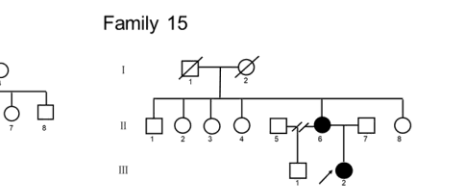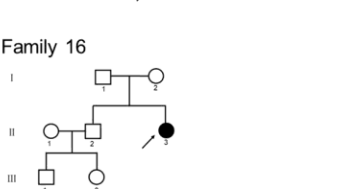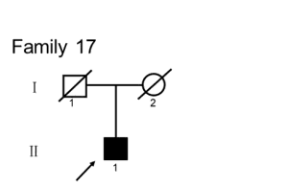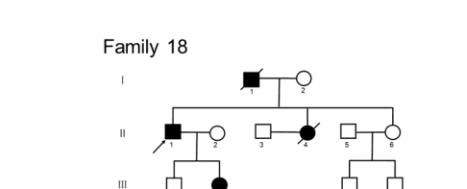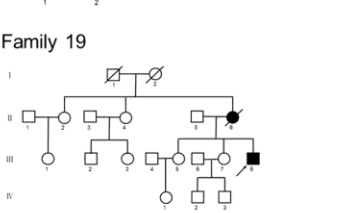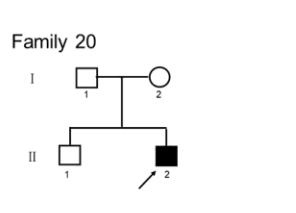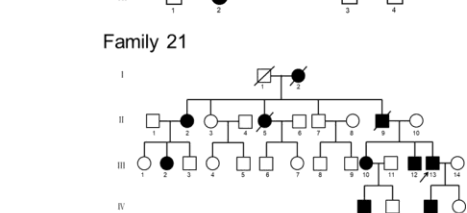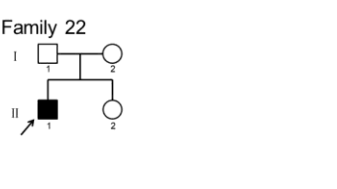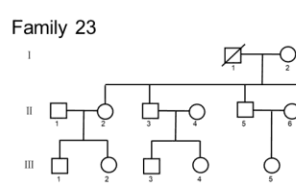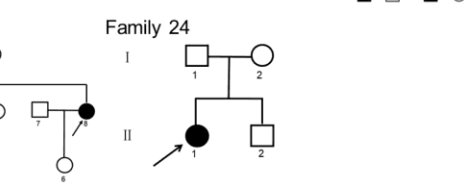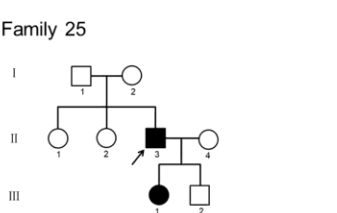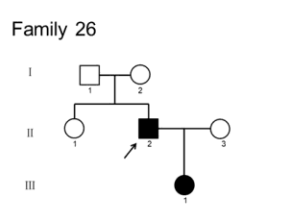

**Supplementary Figure 1:** The pedigree of 26 families. Family members are identified by generations and numbers. Circles and squares denote females and males, respectively; blackened symbols indicate the PJS patient; the proband is indicated by an arrow. Symbols with a slash indicate the individual was already dead.

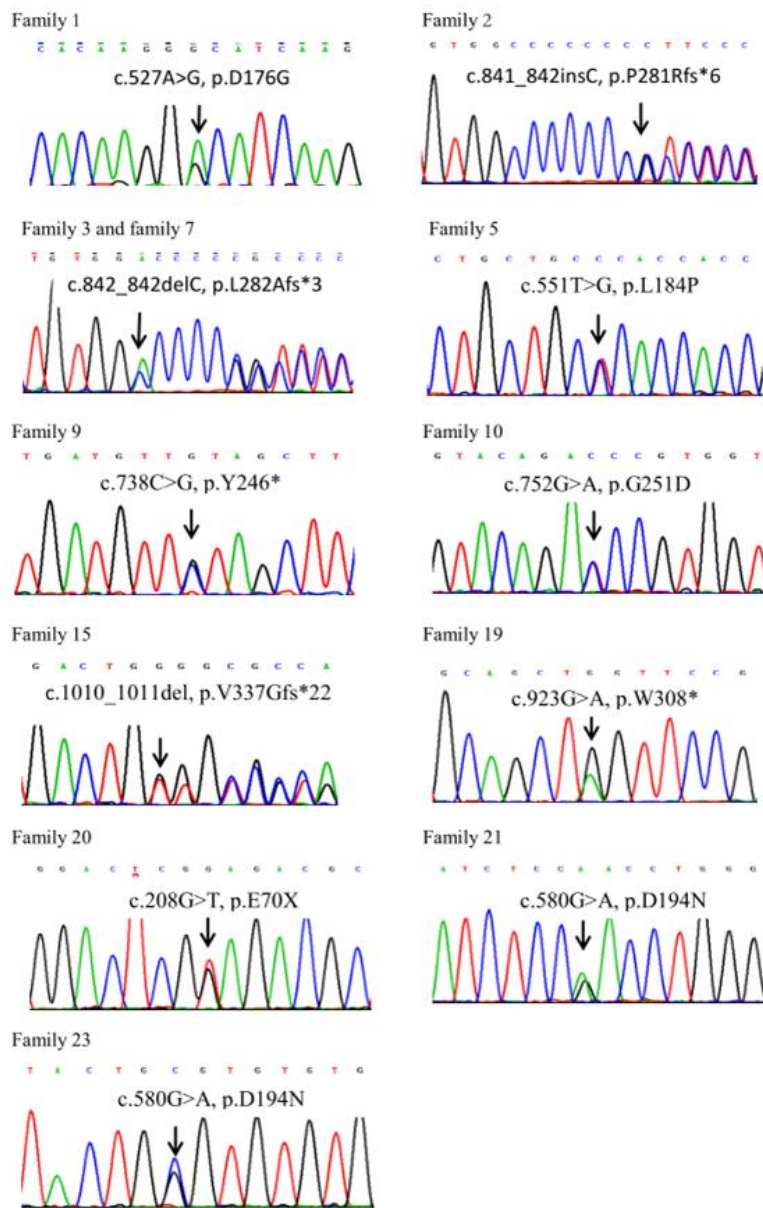

**Supplementary Figure 2:** Chromatogram of 11 other *STK11* gene mutations;

mutations are indicated with arrows.

**Table 1** Primers of *STK11* gene

|          | Forward primer               | Reverse primer                 |
|----------|------------------------------|--------------------------------|
| Exon 1   | 5'-gggactgacgtgtagaacaatc-3' | 5'-ggaaggaagacagaacccatcag-3'  |
| Exon 2   | 5'-tctaggggaaggaggaggta-3'   | 5'-tcaaggagacgggaagagg-3'      |
| Exon 3   | 5'-cctgagctgtgtgtccttag-3'   | 5'-gggccttcattgtcaatgaatc-3'   |
| Exon 4-5 | 5'-ccttcctctgtcctgtgtg-3'    | 5'-ccatctgccgtatgagttacat-3'   |
| Exon 6   | 5'-actgaccacgccttcctc-3'     | 5'-tctccactcagtcctcctcaat-3'   |
| Exon 7   | 5'-ttaggagcgtccaggtatca-3'   | 5'-gccagtgttgggaccag-3'        |
| Exon 8   | 5'-catggctgagcttctgtgg-3'    | 5'-gaggccttggggacgtgggattgg-3' |
| Exon 9   | 5'-gggggcagcatttcagg-3'      | 5'-ggcatccaggcgttgc-3'         |

**Supplementary table 2 Detailed clinical and genetic data for patients with PJS**

| Supplementary table 2 Detailed clinical and genetic data for patients with type 1 |      |                  |               |         |      |                |                    |              |                           |               |                    |    |    |         |
|-----------------------------------------------------------------------------------|------|------------------|---------------|---------|------|----------------|--------------------|--------------|---------------------------|---------------|--------------------|----|----|---------|
| Family                                                                            |      | Mutation         |               | Patient |      |                | Initial evaluation |              | First detection of polyps |               | Clinical course*** |    |    |         |
| ID                                                                                | Exon | Nucleotide       | Effect        | ID      | Sex* | Current Age(y) | Age(y)             | Main Reason* | Age(y)                    | Main Reason** | AP                 | GB | IB | Surgery |
| 1                                                                                 | 4    | c.527A>G         | p.D176G       | 1       | M    | 26             | 20                 | MP           | 20                        | MP            | Y                  | Y  | Y  | Y       |
|                                                                                   |      |                  |               | 2       | M    | 57             | 53                 | FH           | —                         | —             | N                  | N  | N  | N       |
|                                                                                   |      |                  |               | 3       | M    | 27             | 23                 | IB           | 15                        | IB            | Y                  | Y  | Y  | Y       |
|                                                                                   |      |                  |               | 4       | F    | 9              | 5                  | FH           | —                         | —             | N                  | N  | N  | N       |
|                                                                                   |      |                  |               | 5       | M    | 2              | 0                  | FH           | —                         | —             | N                  | N  | N  | N       |
| 2                                                                                 | 6    | c.842_842insC    | p.L282Afs*3   | 6       | F    | 42             | 16                 | GB           | 16                        | GB            | Y                  | Y  | Y  | Y       |
|                                                                                   |      |                  |               | 7       | M    | 18             | 14                 | GB           | 14                        | GB            | Y                  | Y  | N  | N       |
| 3                                                                                 | 6    | c.841_842delC    | p.P281Rfs*6   | 8       | M    | 24             | 17                 | GB           | 17                        | GB            | Y                  | Y  | N  | Y       |
| 4                                                                                 | 7    | c.889A>G         | p.R297G       | 9       | M    | 34             | 22                 | GB           | 22                        | GB            | N                  | Y  | N  | Y       |
|                                                                                   |      |                  |               | 10      | F    | 31             | 25                 | FH           | 25                        | FH            | Y                  | Y  | N  | N       |
| 5                                                                                 | 4    | c.551T>C         | p.L184P       | 11      | F    | 40             | 21                 | FH           | 21                        | FH            | N                  | N  | N  | N       |
|                                                                                   |      |                  |               | 12      | M    | 35             | 20                 | FH           | 20                        | FH            | N                  | N  | N  | N       |
| 6                                                                                 |      | Het del exon 1   |               | 13      | F    | 32             | 23                 | IB           | 23                        | IB            | Y                  | N  | Y  | Y       |
| 7                                                                                 | 6    | c.841_842insC    | p.L282Afs*3   | 14      | F    | 31             | 16                 | IB           | 16                        | IB            | Y                  | Y  | Y  | Y       |
| 8                                                                                 |      | Het del exon 1   |               | 15      | M    | 18             | 11                 | IB           | 11                        | IB            | Y                  | Y  | Y  | Y       |
| 9                                                                                 | 6    | c.738C>G         | p.Y246*       | 16      | M    | 40             | 15                 | IB           | 15                        | IB            | Y                  | N  | Y  | Y       |
| 10                                                                                | 6    | c.752G>A         | p.G251D       | 17      | M    | 37             | 29                 | GB           | 29                        | GB            | N                  | Y  | N  | N       |
| 11                                                                                |      | Het del exon 1   |               | 18      | M    | 35             | 26                 | IB           | 26                        | IB            | Y                  | N  | Y  | Y       |
|                                                                                   |      |                  |               | 19      | F    | 33             | 20                 | FH           | 20                        | FH            | Y                  | N  | N  | N       |
|                                                                                   |      |                  |               | 20      | M    | 45             | 20                 | IB           | 20                        | IB            | Y                  | N  | Y  | Y       |
| 12                                                                                | 3    | c.457_458insCC   | p.H154Pfs*8   | 21      | F    | 21             | 13                 | IB           | 13                        | IB            | Y                  | N  | Y  | Y       |
| 13                                                                                |      | Het del exon 2-3 |               | 22      | M    | 9              | 2                  | GB           | 5                         | GB            | Y                  | Y  | N  | N       |
| 14                                                                                | 3    | c.393C>A         | p.Y131*       | 23      | F    | 22             | 15                 | IB           | 15                        | IB            | Y                  | Y  | Y  | Y       |
| 15                                                                                | 8    | c.1010_1011delTG | p.V337Gfs*22  | 24      | F    | 21             | 17                 | GB           | 17                        | GB            | N                  | Y  | N  | N       |
| 16                                                                                |      | Het del exon 8   |               | 25      | F    | 8              | 5                  | SV           | 5                         | SV            | Y                  | N  | N  | Y       |
| 17                                                                                | 3    | c.428_428delT    | p.V143Gfs*18  | 26      | M    | 19             | 2                  | GB           | 2                         | GB            | Y                  | Y  | Y  | Y       |
| 18                                                                                |      | Het del exon 2-3 |               | 27      | M    | 50             | 43                 | GB           | 43                        | GB            | Y                  | Y  | N  | N       |
| 19                                                                                | 8    | c.923G>A         | p.W308*       | 28      | M    | 31             | 22                 | GB           | 22                        | GB            | Y                  | Y  | N  | N       |
| 20                                                                                | 1    | c.208G>T         | p.E70*        | 29      | M    | 18             | 11                 | IB           | 11                        | IB            | Y                  | N  | Y  | Y       |
| 21                                                                                | 4    | c.580G>A         | p.D194N       | 30      | M    | 32             | 14                 | IB           | 14                        | IB            | Y                  | N  | Y  | Y       |
|                                                                                   |      |                  |               | 31      | M    | 28             | 27                 | FH           | 27                        | FH            | N                  | N  | N  | N       |
| 22                                                                                | 5    | c.601_601delC    | L201Cfs*86    | 32      | M    | 23             | 22                 | IB           | 22                        | IB            | Y                  | N  | Y  | Y       |
| 23                                                                                | 3    | c.396C>G         | C132W         | 33      | F    | 50             | 20                 | IB           | 20                        | IB            | Y                  | Y  | Y  | Y       |
| 24                                                                                | 8    | c.930delG        | p. K311Rfs*25 | 34      | F    | 7              | 6                  | MP           | —                         | —             | N                  | N  | N  | N       |
| 25                                                                                | 5    | c.716G>C         | p.W239S       | 35      | M    | 34             | 20                 | D            | 20                        | D             | Y                  | N  | N  | N       |
|                                                                                   |      |                  |               | 36      | F    | 9              | 9                  | FH           | —                         | —             | N                  | N  | N  | N       |
| 26                                                                                | 2    | c.358G>T         | p. E120*      | 37      | M    | 31             | 10                 | MP           | 18                        | MP            | Y                  | Y  | Y  | N       |
|                                                                                   |      |                  |               | 38      | F    | 4              | 4                  | FH           | —                         | —             | N                  | N  | N  | N       |

\*M=male; F=female; \*\*MP=mucocutaneous hyperpigmentation; FH=family history; GB=gastrointestinal bleeding; IB=intestinal obstruction; SV=Stomach Volvulus; D=diarrhea; "—"represents did not do any intestinal-associated testing; \*\*\*AP=abdominal pain; Y=yes; N=no
