# Supplementary material for: Clinical and Genetic Analyses of 38 Chinese Patients with Peutz-Jeghers Syndrome
Source: Biomed Res Int. 2020 May 11;2020:9159315. doi: 10.1155/2020/9159315 (PMC7240661; doi:10.1155/2020/9159315)
Supplement: Supplementary Materials — Supplementary Figure 1: The pedigree of 26 families. Supplementary Figure 2: Chromatogram of 11 other STK11 gene mutations. Supplementary Table 1: Primers of the STK11 gene. Supplementary Table 2: Detailed clinical and genetic data for patients with PJS. [file 9159315.f1.zip]

Archive with 2 entries (2 files):
- Figure 1 2 3 4 5+Supplementary Figure 1_BMRI_3076268.pptx
- mat.9159315.v2.pdf
